# Supplementary material for: SARS-CoV-2 Impairs Dendritic Cells and Regulates DC-SIGN Gene Expression in Tissues
Source: MDPI journal article supplement (doi:10.3390/ijms22179228), 2021-08-26
Supplement: s1 [file s1]

## Supplementary Materials

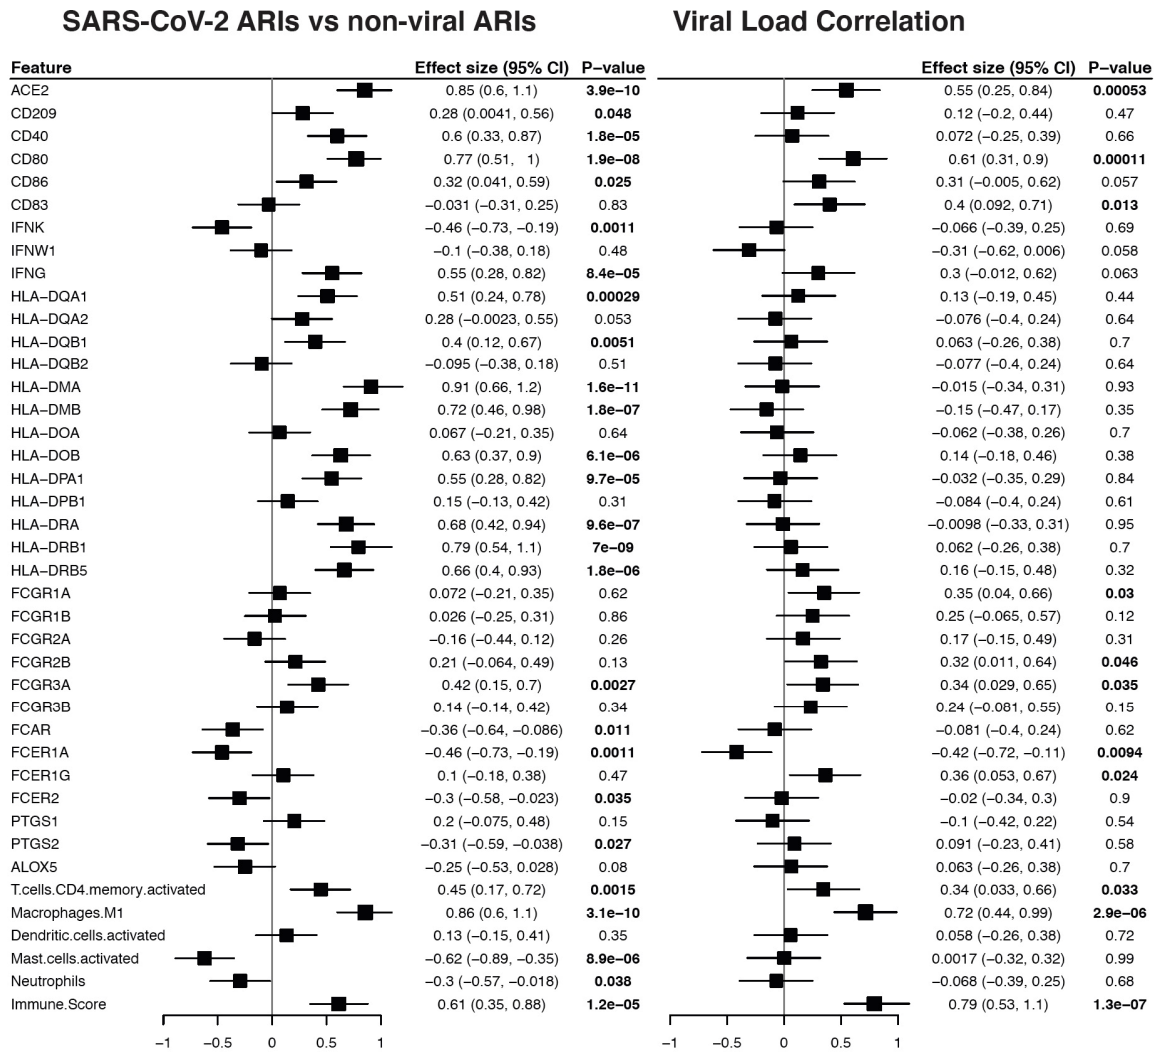

**Figure S1.** The association of SARS-CoV-2 receptors and immune factors with SARS-CoV-2 infection and viral load in nasopharynx/pharynx samples of ARIs. For each feature, results of comparisons between SARS-CoV-2 ARIs and non-viral ARIs are shown on the left and correlations with SARS-CoV-2 viral load are shown on the right. The estimated coefficient and 95% confidence intervals (CIs) were plotted. Significant P values which are less than 0.05 are shown in bold.

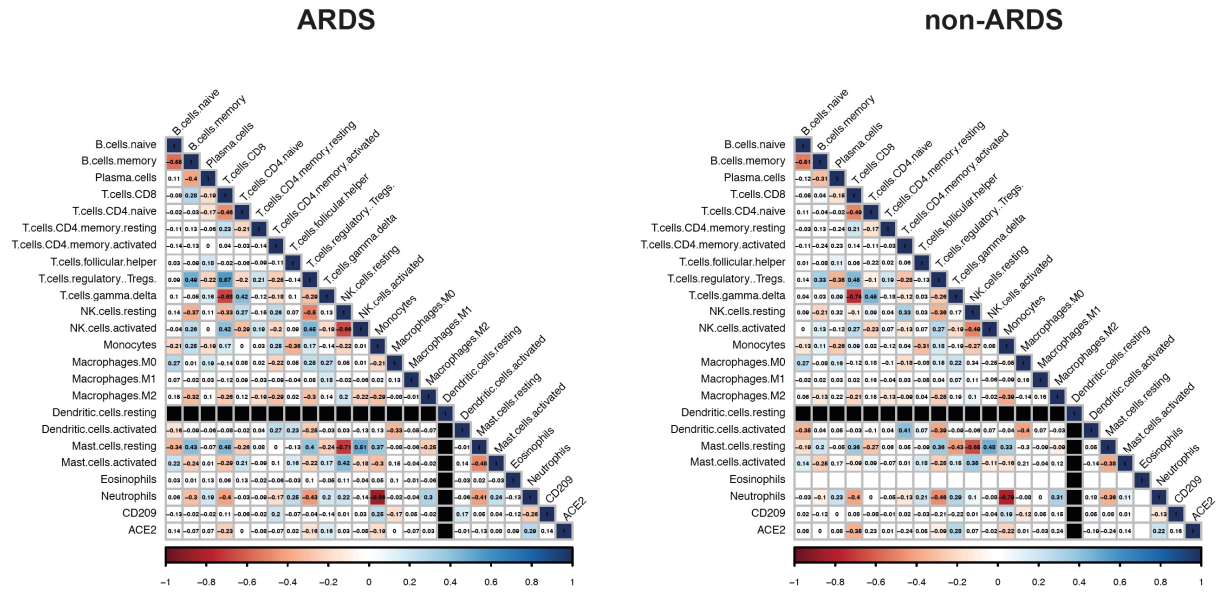

**Figure S2.** Correlation matrix among immune cell composition and the expression of *ACE2*, *CLEC4M* and *CD209* in ARDS and non-ARDS blood samples. Pairwise similarity (Spearman correlation) among the expression of candidate genes and 22 immune cells proportions in ARDS blood samples are shown on the left, and that in non-ARDS blood samples are shown on the right.

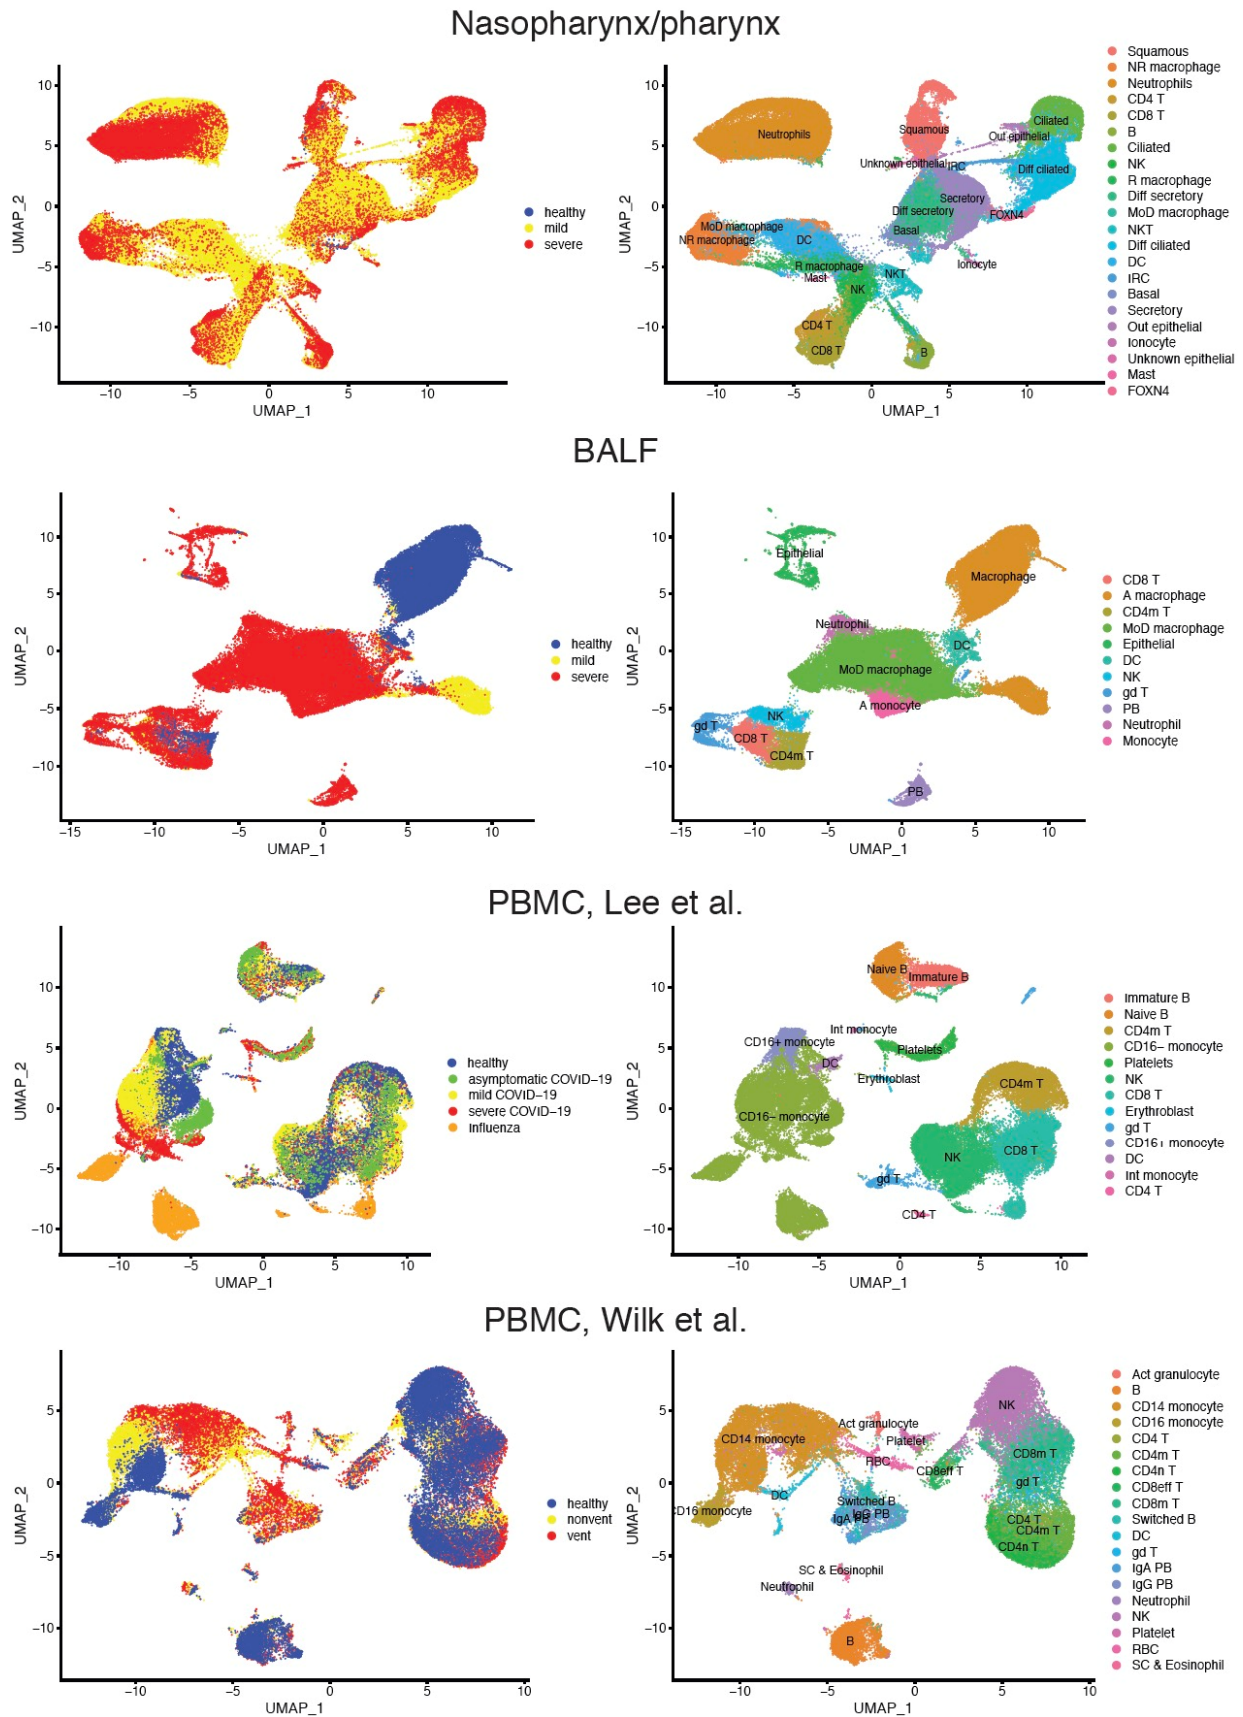

**Figure S3.** Clusters of single-cell transcriptomics of nasopharynx/pharynx, BALF and PMBC samples from COVID-19 cases and healthy controls. For each dataset, the left shows UMAP embedding of single-cell transcriptome profiles from COVID-19 mild and severe cases, and healthy controls. The right shows identified cell types.

## PBMC, Lee et al.

asymptomatic vs healthy

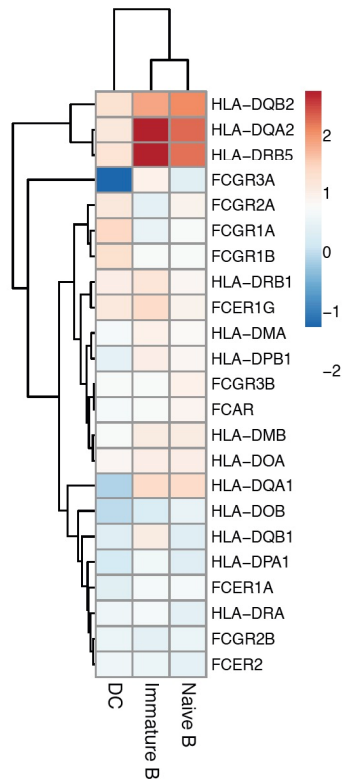

mild vs healthy

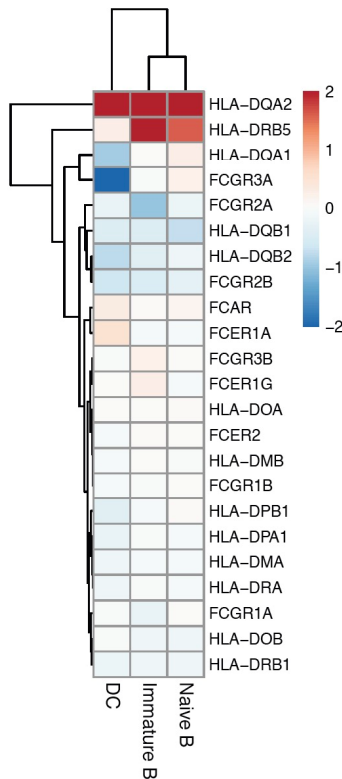

severe vs healthy

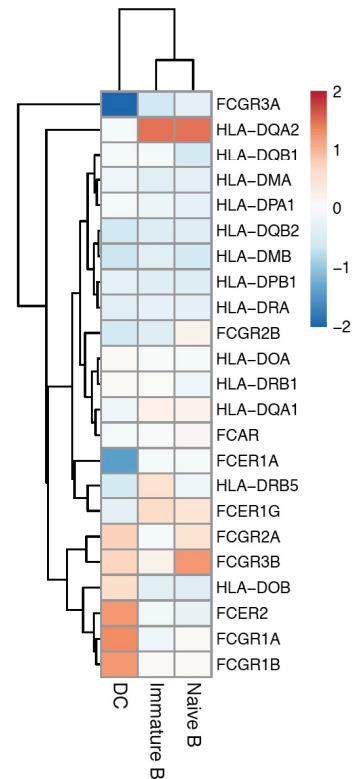

**Figure S4.** The dysregulation of gene expression of MHCII and FcRs in APCs in blood with COVID-19. In the PBMC scRNA-seq dataset of Lee et al., the alterations of gene expression in asymptomatic, mild and severe COVID-19 cases compared to healthy controls were analyzed and visualized in heatmaps. Red indicates upregulation and blue indicates downregulation. The scale corresponds to  $\log_2FC$ .



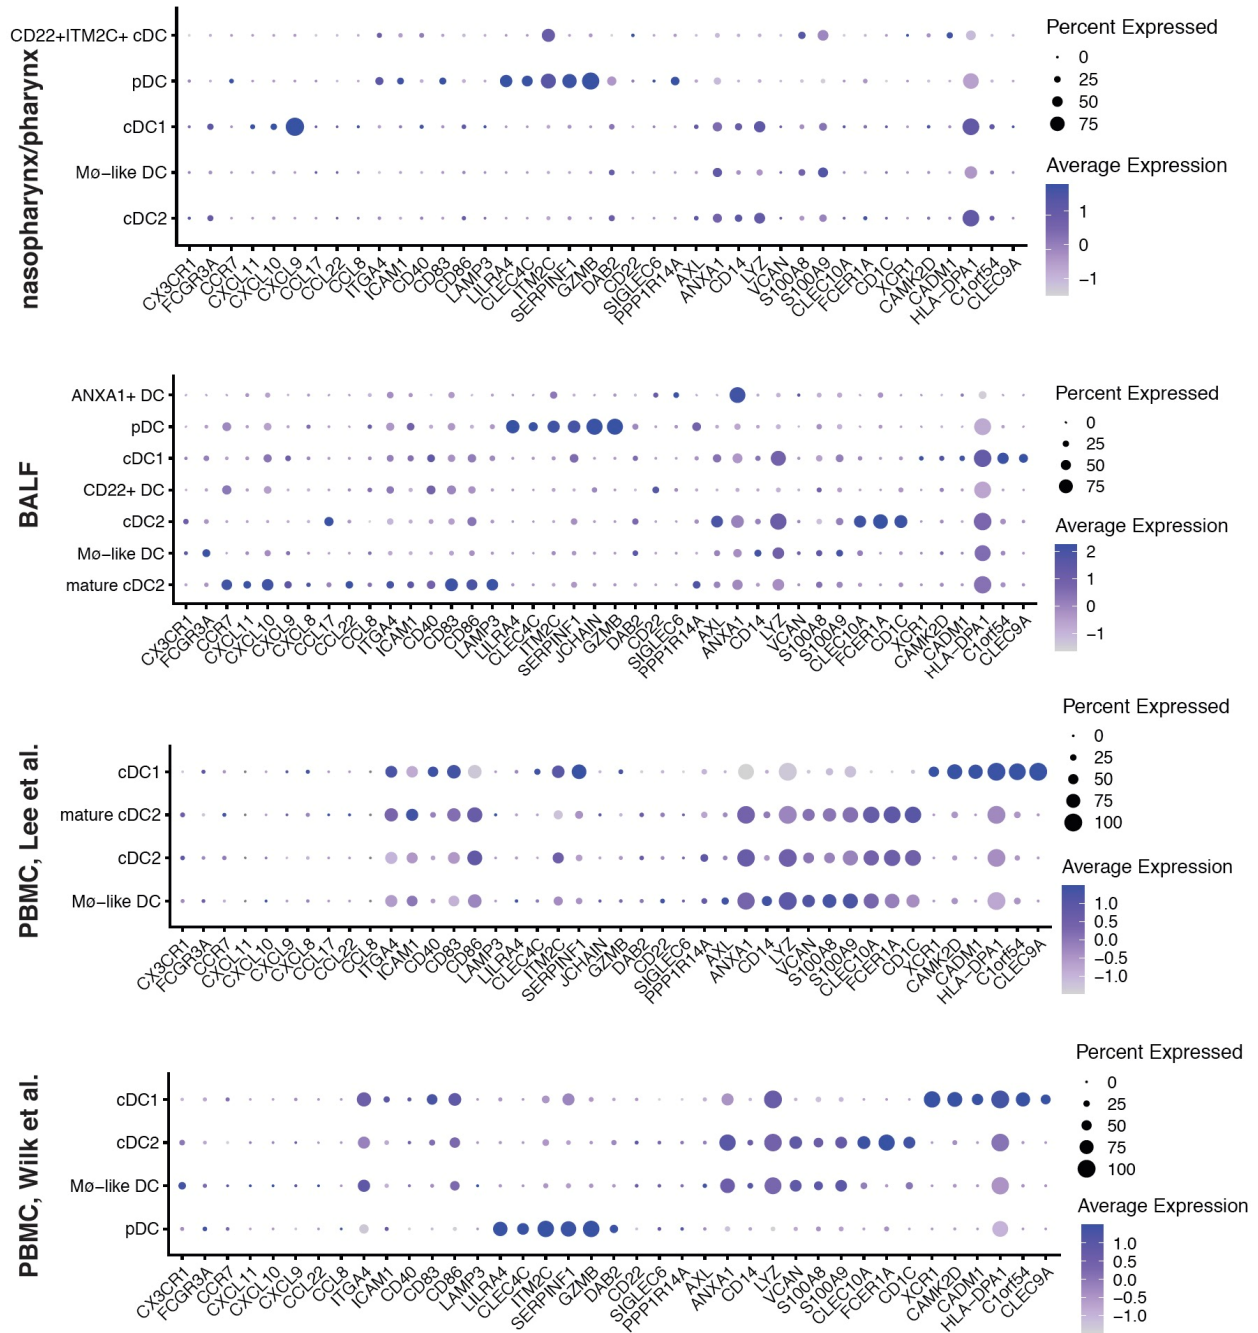

**Figure S5.** Expression profiles of DC subset markers in four scRNA-seq datasets of nasopharynx/pharynx, BALF and PBMC samples from COVID-19 patients and healthy controls. For each dataset, the detection rate (corresponding to dot size, larger dot indicates higher detection rate) and average expression level (corresponding to dot color, darker indicates higher expression level) of each cell-type marker are shown in identified DC subtypes.

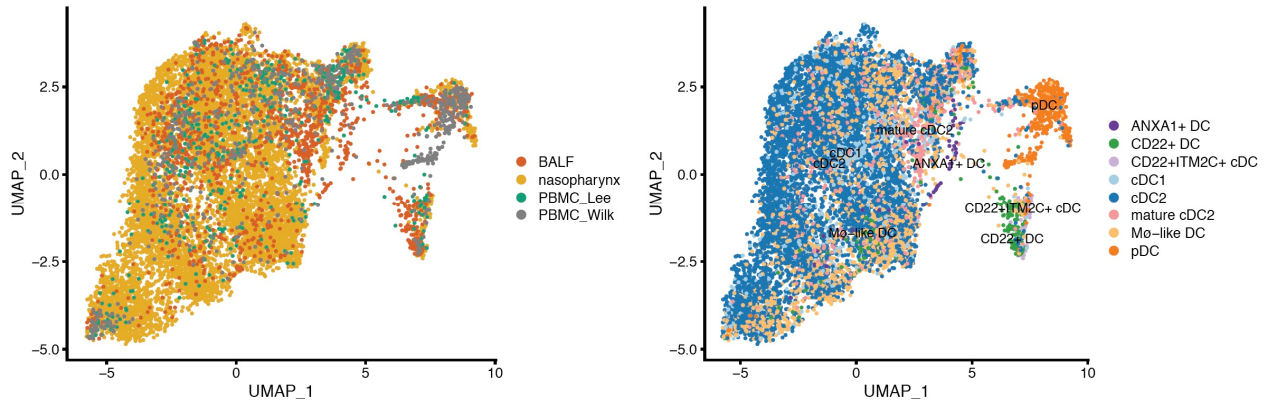

**Figure S6.** Integrated single-cell transcriptomics of nasopharynx/pharynx, BALF and PMBC samples from COVID-19 cases and healthy controls. The left shows UMAP embedding of single-cell transcriptome profiles from COVID-19 mild and severe cases, and healthy controls. The right shows identified cell types.

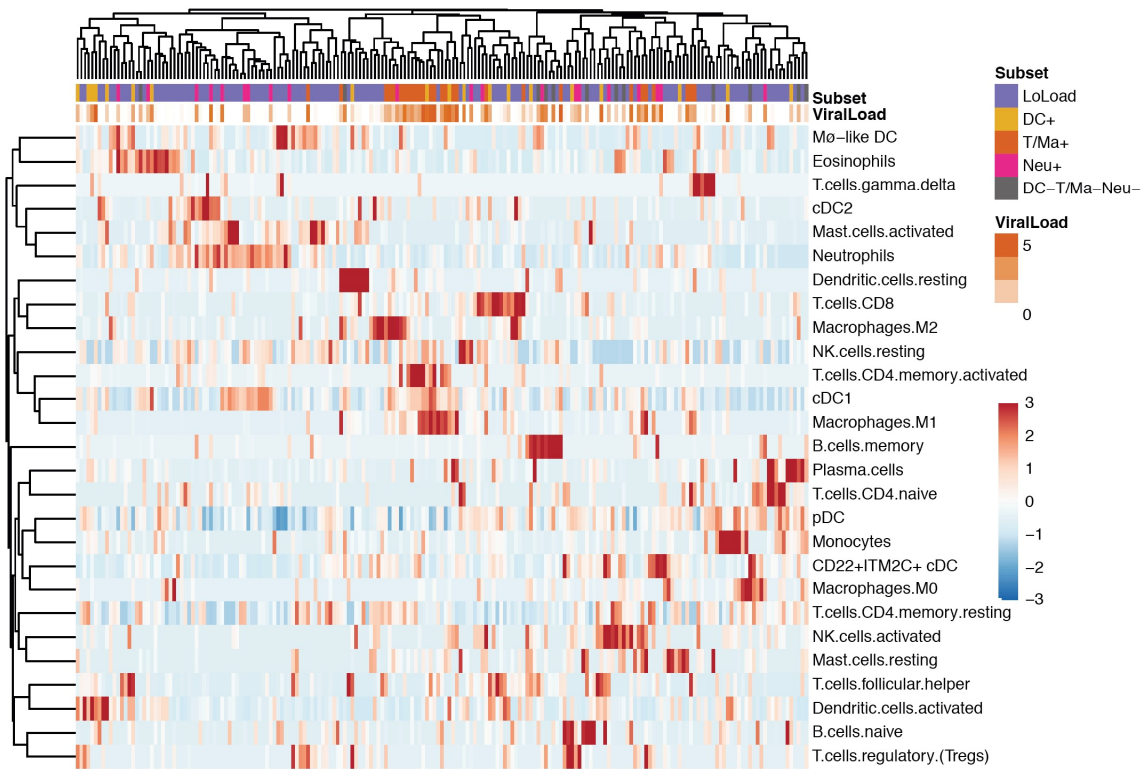

**Figure S7.** Hierarchical clustering and heatmap of immune cell composition in ARI nasopharynx/pharynx samples from COVID-19 cases and healthy controls. For each cell type, red indicates relatively higher proportion and blue indicates relatively lower proportion across samples. The scale corresponds to the relative value across samples.

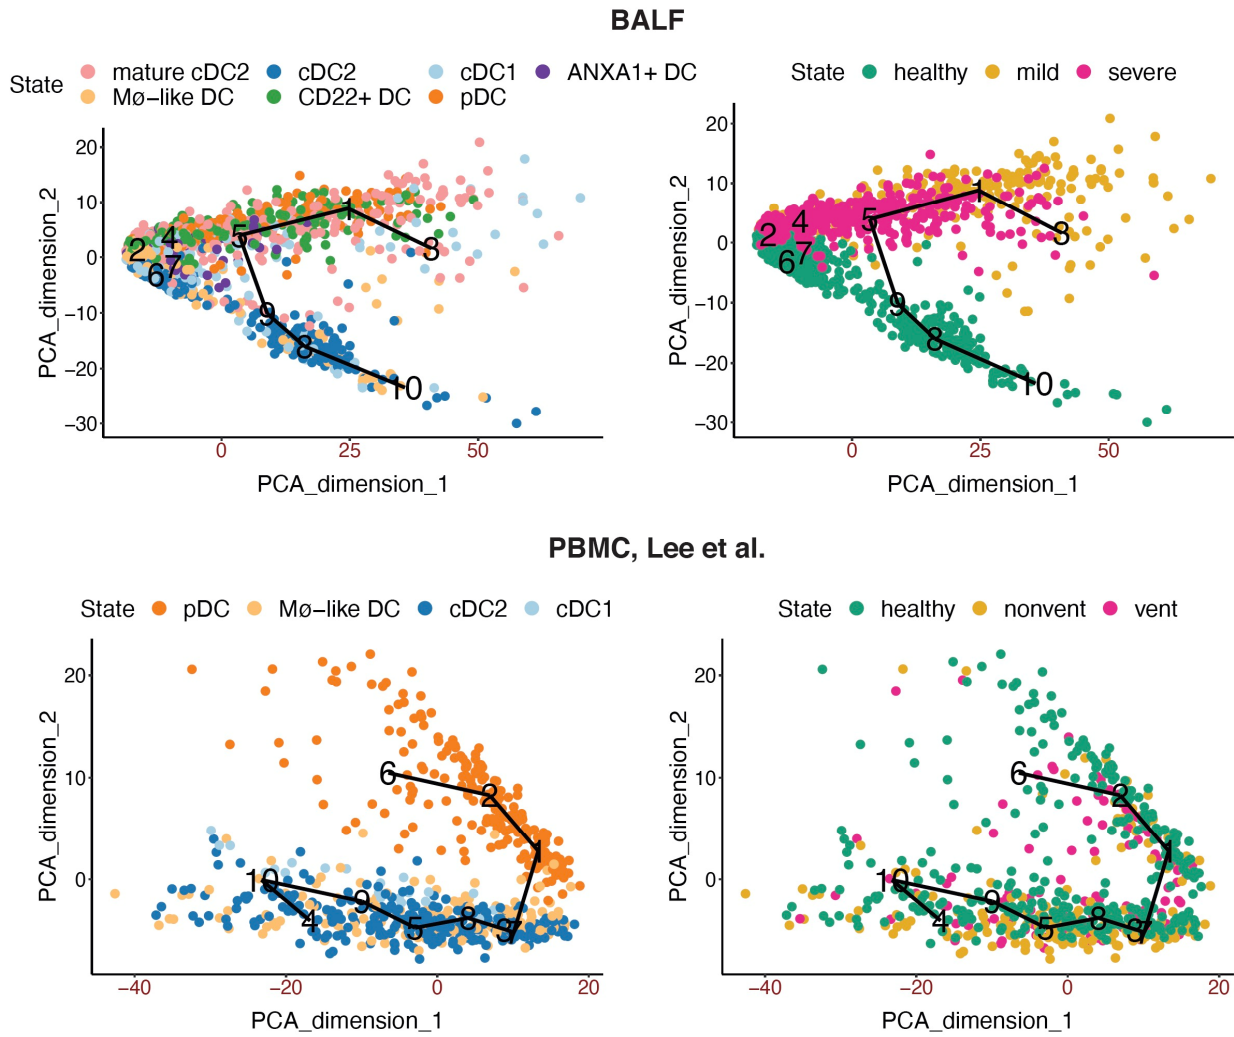

**Figure S8.** Single-cell trajectory of DCs in COVID-19 BALF and PMBC samples. The Single-cell trajectory was inferred by TSCAN. The left shows ordered cells labeled with cell types. The right shows ordered cells from COVID-19 mild and severe cases, and healthy controls.

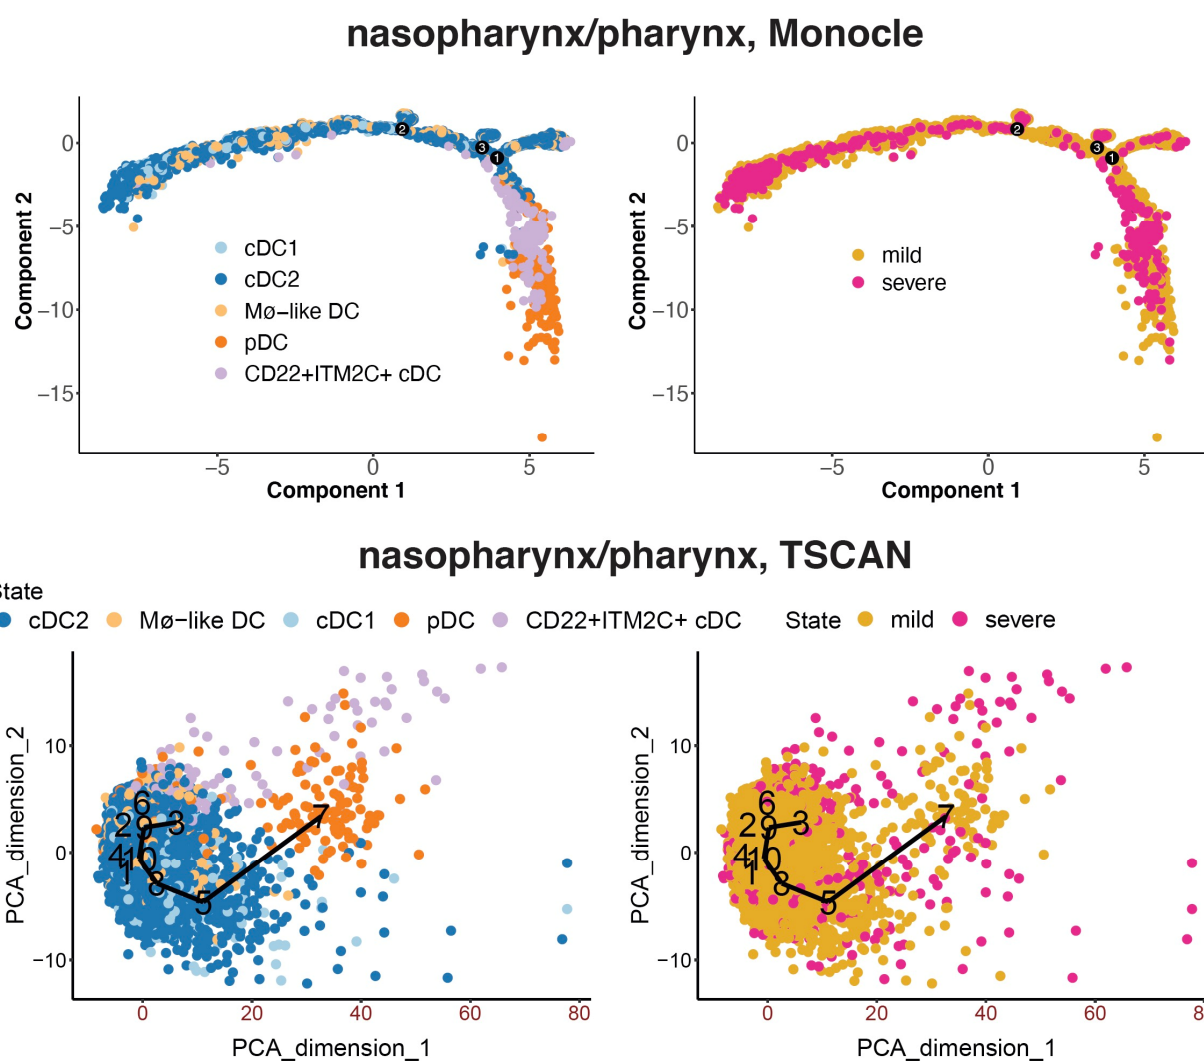

**Figure S9.** Single-cell trajectory of DCs in COVID-19 nasopharynx/pharynx samples. The Single-cell trajectory was inferred by Monocle (top) and TSCAN (bottom). The left shows ordered cells labeled with cell types. The right shows ordered cells from COVID-19 mild and severe cases.

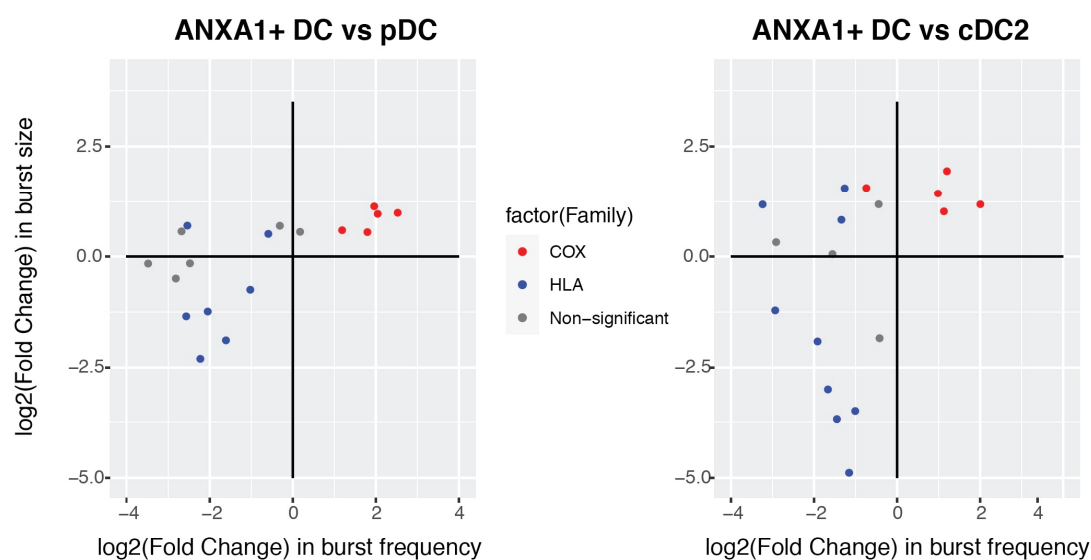

**Figure S10. Transcriptional bursting profiles in different DC subsets in lung.** The changes in burst frequency and burst size of HLA genes (blue) and Cox genes (red) in ANXA1+ DC compared to pDC (left) and cDC2 (right) are plotted in log<sub>2</sub> scale.

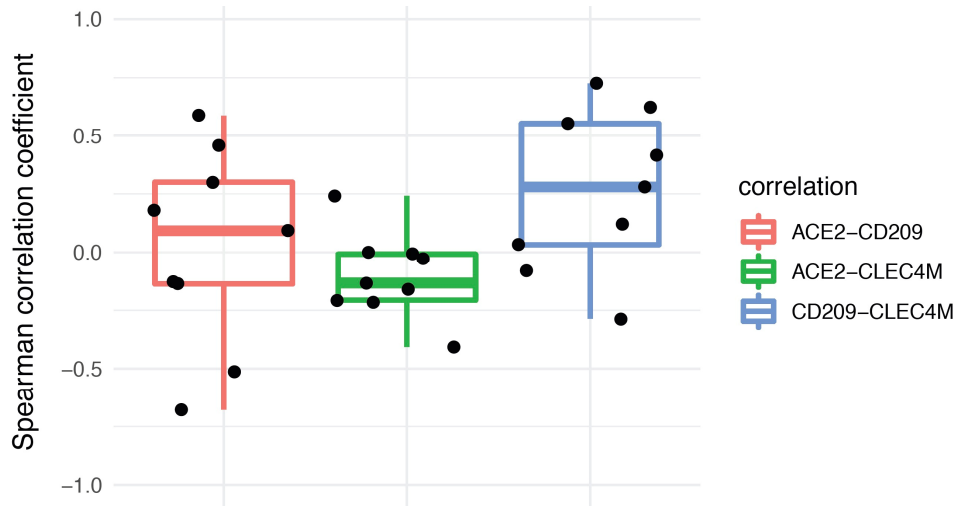

**Figure S11.** Correlation of genes *ACE2*, *CLEC4M* and *CD209* in normal lung tissues. Spearman correlation coefficients for expression of each pair of genes were shown in boxplot.

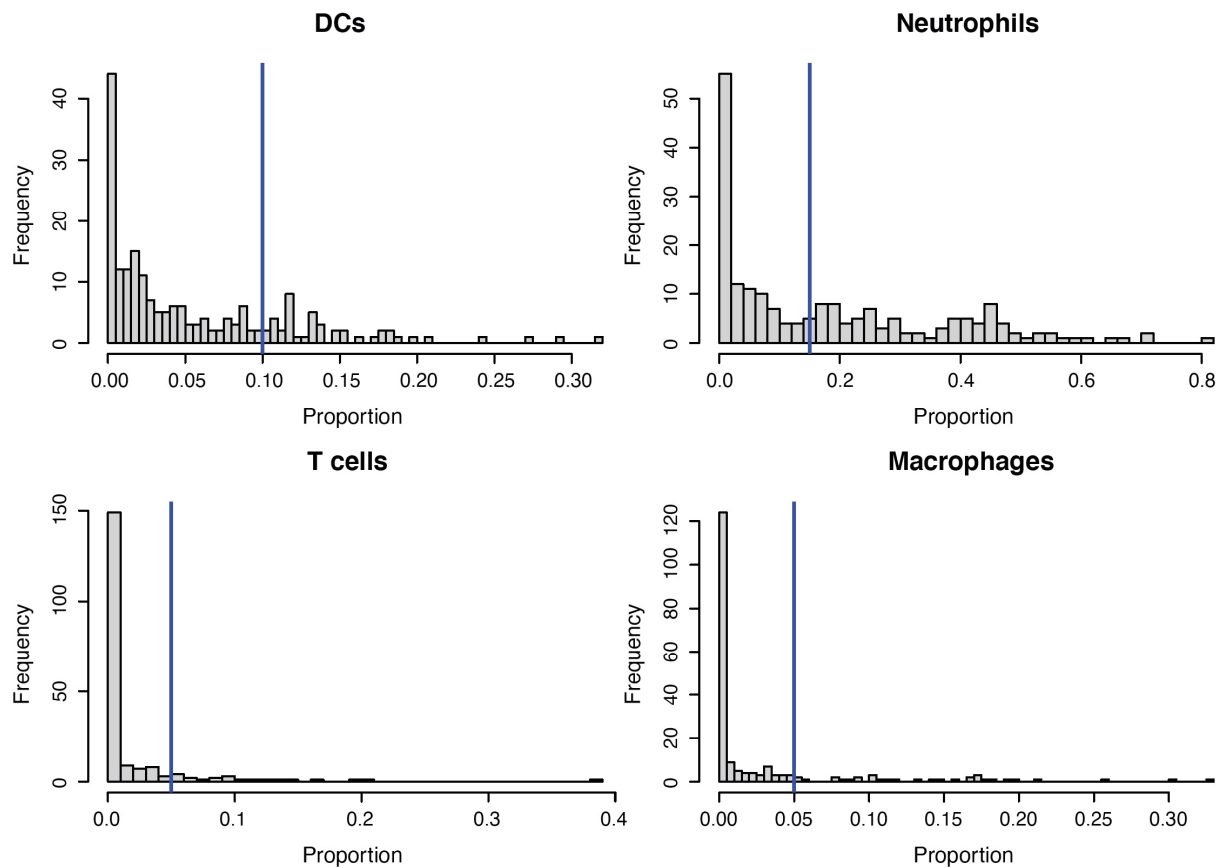

**Figure S12.** Distribution of cell proportions in ARI samples. The distribution of inferred cell proportions of DCs, Neutrophils, T cell and Macrophages were shown in histograms. Blue vertical lines show the thresholds for identify subtypes with enrichment of specific cell types.



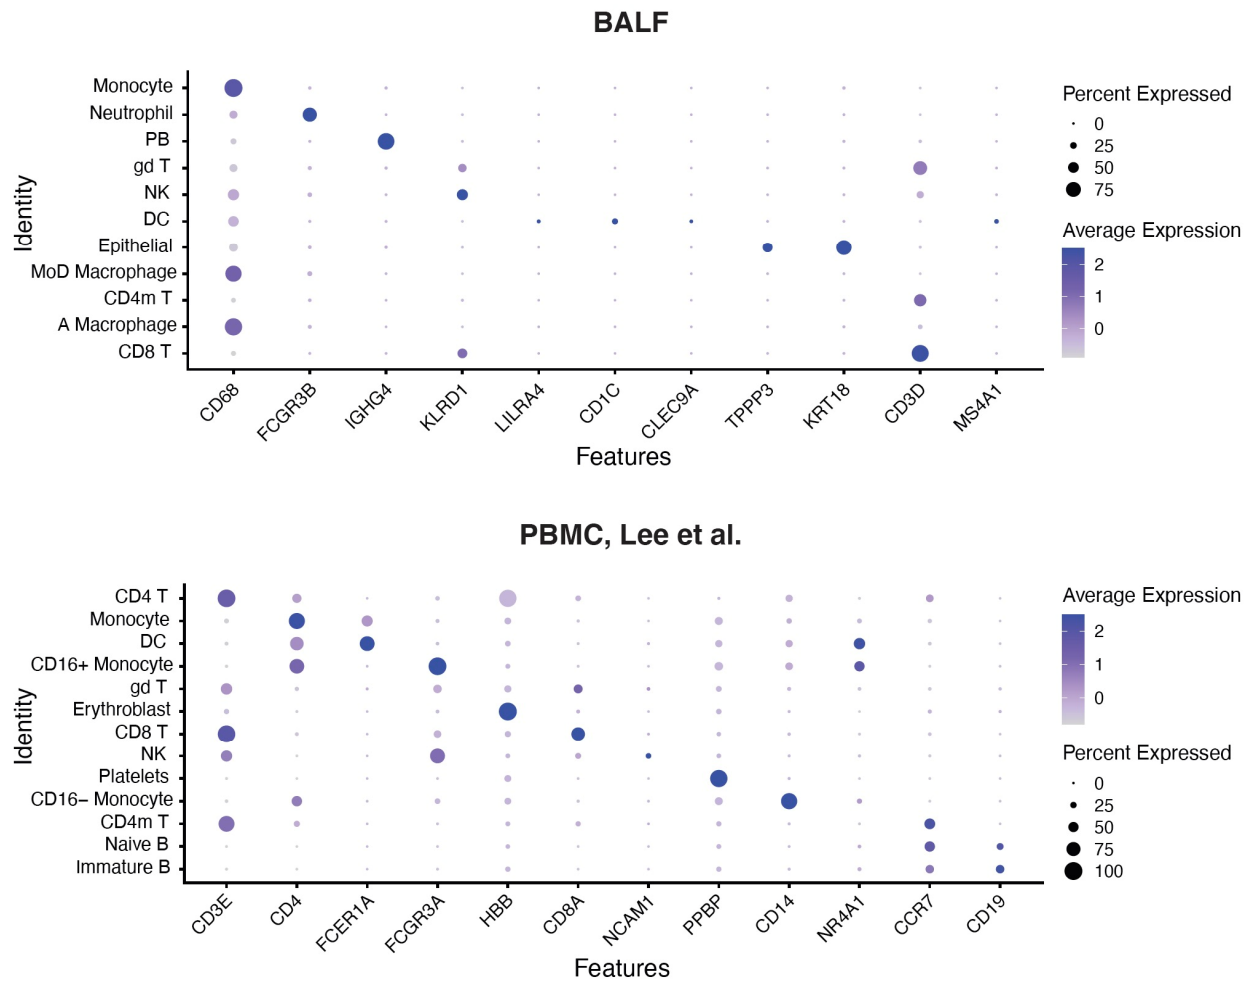

**Figure S13.** Expression profiles of cell type markers in BALF and Lee et al. PBMC samples. For each dataset, the detection rate (corresponding to dot size, larger dot indicates higher detection rate) and average expression level (corresponding to dot color, darker indicates higher expression level) of each cell-type marker are shown in identified cell types.

**Table S1.** Mendelian Randomization inferred causal effect of plasma expression of ACE2, DC-SIGN and L-SIGN on COVID-19 risk and severity in the European population.

| Outcome           | Exposure                  | Method                    | nsnp | b     | se   | pval                  |
|-------------------|---------------------------|---------------------------|------|-------|------|-----------------------|
| COVID-19 risk     | plasma DC-SIGN expression | MR Egger                  | 3    | 0.12  | 0.10 | $4.49 \times 10^{-1}$ |
|                   |                           | Weighted median           | 3    | 0.14  | 0.05 | $4.17 \times 10^{-3}$ |
|                   |                           | Inverse variance weighted | 3    | 0.14  | 0.05 | $3.39 \times 10^{-3}$ |
|                   |                           | Simple mode               | 3    | 0.11  | 0.07 | $2.59 \times 10^{-1}$ |
|                   |                           | Weighted mode             | 3    | 0.13  | 0.05 | $1.21 \times 10^{-1}$ |
| COVID-19 severity | plasma DC-SIGN expression | MR Egger                  | 3    | 0.42  | 0.18 | $2.61 \times 10^{-1}$ |
|                   |                           | Weighted median           | 3    | 0.31  | 0.06 | $2.21 \times 10^{-7}$ |
|                   |                           | Inverse variance weighted | 3    | 0.30  | 0.08 | $5.41 \times 10^{-5}$ |
|                   |                           | Simple mode               | 3    | 0.35  | 0.13 | $1.14 \times 10^{-1}$ |
|                   |                           | Weighted mode             | 3    | 0.34  | 0.07 | $3.60 \times 10^{-2}$ |
| COVID-19 risk     | plasma ACE2 expression    | MR Egger                  | 60   | 0.38  | 0.21 | $8.41 \times 10^{-2}$ |
|                   |                           | Weighted median           | 60   | 0.04  | 0.07 | $6.08 \times 10^{-1}$ |
|                   |                           | Inverse variance weighted | 60   | 0.04  | 0.05 | $4.05 \times 10^{-1}$ |
|                   |                           | Simple mode               | 60   | 0.04  | 0.15 | $8.09 \times 10^{-1}$ |
|                   |                           | Weighted mode             | 60   | 0.04  | 0.16 | $8.24 \times 10^{-1}$ |
| COVID-19 severity | plasma ACE2 expression    | MR Egger                  | 59   | 0.28  | 0.26 | $2.86 \times 10^{-1}$ |
|                   |                           | Weighted median           | 59   | 0.05  | 0.09 | $6.08 \times 10^{-1}$ |
|                   |                           | Inverse variance weighted | 59   | 0.01  | 0.06 | $9.02 \times 10^{-1}$ |
|                   |                           | Simple mode               | 59   | 0.15  | 0.22 | $5.01 \times 10^{-1}$ |
|                   |                           | Weighted mode             | 59   | 0.17  | 0.24 | $4.70 \times 10^{-1}$ |
| COVID-19 risk     | plasma L-SIGN expression  | Wald ratio                | 1    | 0.41  | 0.23 | $7.70 \times 10^{-2}$ |
| COVID-19 severity |                           | Wald ratio                | 1    | -0.18 | 0.29 | $5.42 \times 10^{-1}$ |

nsnp: number of SNPs used in analysis; b: beta coefficient; se: standard error

**Table S2.** The top 100 CD209 expression associated traits identified by GWAS.

| rsid        | a1 | a2 | Phenotype                                                                      | phenotype_source | ancestry | effect_size | pvalue                 |
|-------------|----|----|--------------------------------------------------------------------------------|------------------|----------|-------------|------------------------|
| rs536227604 | T  | C  | Cause of death: asthma, unspecified                                            | UKBB             | European | -0.067      | $1.00 \times 10^{-13}$ |
| rs538085590 | A  | G  | Benign neoplasm of urinary organs                                              | UKBB             | European | -0.002      | $2.85 \times 10^{-12}$ |
| rs71534255  | A  | C  | Cause of death: chronic myeloid leukaemia                                      | UKBB             | European | 0.051       | $1.01 \times 10^{-11}$ |
| rs536227604 | T  | C  | Malignant neoplasm of tonsil                                                   | UKBB             | European | -0.004      | $8.42 \times 10^{-10}$ |
| rs73493971  | A  | G  | Self-reported parathyroid hyperplasia or adenoma                               | UKBB             | European | -0.003      | $4.40 \times 10^{-9}$  |
| rs190601505 | A  | G  | Self-reported parathyroid hyperplasia or adenoma                               | UKBB             | European | 0.003       | $9.58 \times 10^{-9}$  |
| rs73493971  | A  | G  | Cause of death: cerebrum, except lobes and ventricles                          | UKBB             | European | -0.027      | $1.07 \times 10^{-8}$  |
| rs190601505 | A  | G  | Cause of death: cerebrum, except lobes and ventricles                          | UKBB             | European | 0.026       | $1.48 \times 10^{-8}$  |
| rs185373670 | T  | C  | Treatment with cinnarizine                                                     | UKBB             | European | 0.004       | $2.32 \times 10^{-8}$  |
| rs11465395  | C  | G  | Treatment with maxalt 5mg tablet                                               | UKBB             | European | 0.003       | $2.99 \times 10^{-8}$  |
| rs73493973  | A  | G  | Treatment with maxalt 5mg tablet                                               | UKBB             | European | 0.003       | $3.94 \times 10^{-8}$  |
| rs73493968  | T  | C  | Treatment with maxalt 5mg tablet                                               | UKBB             | European | -0.003      | $4.09 \times 10^{-8}$  |
| rs73493965  | T  | C  | Treatment with maxalt 5mg tablet                                               | UKBB             | European | 0.003       | $4.22 \times 10^{-8}$  |
| rs73493966  | C  | G  | Treatment with maxalt 5mg tablet                                               | UKBB             | European | -0.003      | $4.30 \times 10^{-8}$  |
| rs114437818 | T  | G  | Treatment with maxalt 5mg tablet                                               | UKBB             | European | -0.003      | $4.40 \times 10^{-8}$  |
| rs114878389 | A  | G  | Treatment with maxalt 5mg tablet                                               | UKBB             | European | 0.003       | $4.41 \times 10^{-8}$  |
| rs112039104 | A  | C  | Treatment with maxalt 5mg tablet                                               | UKBB             | European | 0.003       | $4.69 \times 10^{-8}$  |
| rs113398041 | T  | C  | Treatment with maxalt 5mg tablet                                               | UKBB             | European | -0.003      | $4.71 \times 10^{-8}$  |
| rs73493975  | A  | G  | Treatment with maxalt 5mg tablet                                               | UKBB             | European | -0.003      | $4.81 \times 10^{-8}$  |
| rs61058460  | T  | C  | Treatment with maxalt 5mg tablet                                               | UKBB             | European | -0.003      | $5.45 \times 10^{-8}$  |
| rs77982873  | T  | C  | Treatment with maxalt 5mg tablet                                               | UKBB             | European | -0.003      | $5.49 \times 10^{-8}$  |
| rs77377087  | A  | T  | Treatment with maxalt 5mg tablet                                               | UKBB             | European | -0.003      | $5.49 \times 10^{-8}$  |
| rs61468896  | T  | C  | Treatment with maxalt 5mg tablet                                               | UKBB             | European | 0.003       | $5.52 \times 10^{-8}$  |
| rs17159887  | T  | C  | Treatment with maxalt 5mg tablet                                               | UKBB             | European | -0.003      | $6.28 \times 10^{-8}$  |
| rs57889796  | T  | C  | Treatment with maxalt 5mg tablet                                               | UKBB             | European | -0.003      | $6.56 \times 10^{-8}$  |
| rs57668221  | C  | G  | Treatment with maxalt 5mg tablet                                               | UKBB             | European | -0.003      | $6.91 \times 10^{-8}$  |
| rs78866372  | A  | G  | Cause of death: cerebral infarction, unspecified                               | UKBB             | European | 0.036       | $7.18 \times 10^{-8}$  |
| rs185373670 | T  | C  | Malignant neoplasm of other and unspecified parts of tongue                    | UKBB             | European | 0.003       | $9.50 \times 10^{-8}$  |
| rs111716431 | A  | G  | Treatment with maxalt 5mg tablet                                               | UKBB             | European | 0.003       | $9.96 \times 10^{-8}$  |
| rs536227604 | T  | C  | Self-reported giant cell or temporal arteritis                                 | UKBB             | European | -0.003      | $2.96 \times 10^{-7}$  |
| rs185373670 | T  | C  | Enthesopathies of lower limb, excluding foot                                   | UKBB             | European | 0.003       | $3.40 \times 10^{-7}$  |
| rs538085590 | A  | G  | Cause of death: vascular disorder of intestine, unspecified                    | UKBB             | European | -0.04       | $4.74 \times 10^{-7}$  |
| rs11465411  | A  | G  | Cause of death: inquest adjourned death                                        | UKBB             | European | -0.009      | $8.45 \times 10^{-7}$  |
| rs11465410  | T  | C  | Cause of death: inquest adjourned death                                        | UKBB             | European | -0.009      | $8.85 \times 10^{-7}$  |
| rs111716431 | A  | G  | Cause of death: urinary tract infection, site not specified                    | UKBB             | European | 0.034       | $9.40 \times 10^{-7}$  |
| rs185373670 | T  | C  | Treatment with fybogel orange s or f granules                                  | UKBB             | European | 0.006       | $9.52 \times 10^{-7}$  |
| rs71534255  | A  | C  | Cause of death: sigmoid colon                                                  | UKBB             | European | 0.087       | $1.09 \times 10^{-6}$  |
| rs11465409  | A  | G  | Cause of death: inquest adjourned death                                        | UKBB             | European | 0.008       | $1.11 \times 10^{-6}$  |
| rs71534255  | A  | C  | Treatment with metrogel 0.75% gel                                              | UKBB             | European | 0.003       | $1.11 \times 10^{-6}$  |
| rs11465412  | A  | G  | Cause of death: inquest adjourned death                                        | UKBB             | European | 0.008       | $1.25 \times 10^{-6}$  |
| rs73493971  | A  | G  | Treatment with cyclizine                                                       | UKBB             | European | -0.003      | $1.26 \times 10^{-6}$  |
| rs185373670 | T  | C  | Cause of death: secondary malignant neoplasm of retroperitoneum and peritoneum | UKBB             | European | 0.028       | $1.65 \times 10^{-6}$  |
| rs114878389 | A  | G  | Cause of death: cerebrum, except lobes and ventricles                          | UKBB             | European | 0.018       | $2.39 \times 10^{-6}$  |
| rs114437818 | T  | G  | Cause of death: cerebrum, except lobes and ventricles                          | UKBB             | European | -0.018      | $2.40 \times 10^{-6}$  |
| rs11465395  | C  | G  | Cause of death: cerebrum, except lobes and ventricles                          | UKBB             | European | 0.018       | $2.41 \times 10^{-6}$  |
| rs73493968  | T  | C  | Cause of death: cerebrum, except lobes and ventricles                          | UKBB             | European | -0.018      | $2.62 \times 10^{-6}$  |
| rs61468896  | T  | C  | Cause of death: cerebrum, except lobes and ventricles                          | UKBB             | European | 0.018       | $2.67 \times 10^{-6}$  |
| rs73493966  | C  | G  | Cause of death: cerebrum, except lobes and ventricles                          | UKBB             | European | -0.018      | $2.69 \times 10^{-6}$  |

|             |   |   |                                                                            |      |          |        |                       |
|-------------|---|---|----------------------------------------------------------------------------|------|----------|--------|-----------------------|
| rs73493965  | T | C | Cause of death: cerebrum, except lobes and ventricles                      | UKBB | European | 0.018  | $2.69 \times 10^{-6}$ |
| rs73493973  | A | G | Cause of death: cerebrum, except lobes and ventricles                      | UKBB | European | 0.018  | $2.73 \times 10^{-6}$ |
| rs112039104 | A | C | Cause of death: cerebrum, except lobes and ventricles                      | UKBB | European | 0.018  | $2.80 \times 10^{-6}$ |
| rs73493975  | A | G | Cause of death: cerebrum, except lobes and ventricles                      | UKBB | European | -0.018 | $2.82 \times 10^{-6}$ |
| rs113398041 | T | C | Cause of death: cerebrum, except lobes and ventricles                      | UKBB | European | -0.018 | $2.83 \times 10^{-6}$ |
| rs61058460  | T | C | Cause of death: cerebrum, except lobes and ventricles                      | UKBB | European | -0.018 | $2.85 \times 10^{-6}$ |
| rs77982873  | T | C | Cause of death: cerebrum, except lobes and ventricles                      | UKBB | European | -0.018 | $3.13 \times 10^{-6}$ |
| rs77377087  | A | T | Cause of death: cerebrum, except lobes and ventricles                      | UKBB | European | -0.018 | $3.13 \times 10^{-6}$ |
| rs17159887  | T | C | Cause of death: cerebrum, except lobes and ventricles                      | UKBB | European | -0.018 | $3.15 \times 10^{-6}$ |
| rs57668221  | C | G | Cause of death: cerebrum, except lobes and ventricles                      | UKBB | European | -0.018 | $3.17 \times 10^{-6}$ |
| rs57889796  | T | C | Cause of death: cerebrum, except lobes and ventricles                      | UKBB | European | -0.018 | $3.17 \times 10^{-6}$ |
| rs11465395  | C | G | Other disorders of ear                                                     | UKBB | European | 0.002  | $3.54 \times 10^{-6}$ |
| rs71534255  | A | C | Cause of death: cardiomegaly                                               | UKBB | European | 0.052  | $3.98 \times 10^{-6}$ |
| rs185373670 | T | C | Treatment with indoramin                                                   | UKBB | European | 0.002  | $4.28 \times 10^{-6}$ |
| rs73493968  | T | C | Other disorders of ear                                                     | UKBB | European | -0.002 | $4.33 \times 10^{-6}$ |
| rs73493973  | A | G | Other disorders of ear                                                     | UKBB | European | 0.002  | $4.33 \times 10^{-6}$ |
| rs73493966  | C | G | Other disorders of ear                                                     | UKBB | European | -0.002 | $4.34 \times 10^{-6}$ |
| rs111716431 | A | G | Self-reported parathyroid hyperplasia or adenoma                           | UKBB | European | 0.002  | $4.34 \times 10^{-6}$ |
| rs538085590 | A | G | Diabetes mellitus in pregnancy                                             | UKBB | European | -0.002 | $4.38 \times 10^{-6}$ |
| rs114437818 | T | G | Other disorders of ear                                                     | UKBB | European | -0.002 | $4.50 \times 10^{-6}$ |
| rs114878389 | A | G | Other disorders of ear                                                     | UKBB | European | 0.002  | $4.50 \times 10^{-6}$ |
| rs73493965  | T | C | Other disorders of ear                                                     | UKBB | European | 0.002  | $4.52 \times 10^{-6}$ |
| rs112039104 | A | C | Other disorders of ear                                                     | UKBB | European | 0.002  | $4.72 \times 10^{-6}$ |
| rs113398041 | T | C | Other disorders of ear                                                     | UKBB | European | -0.002 | $4.73 \times 10^{-6}$ |
| rs73493975  | A | G | Other disorders of ear                                                     | UKBB | European | -0.002 | $4.95 \times 10^{-6}$ |
| rs61058460  | T | C | Other disorders of ear                                                     | UKBB | European | -0.002 | $5.32 \times 10^{-6}$ |
| rs61468896  | T | C | Other disorders of ear                                                     | UKBB | European | 0.002  | $5.37 \times 10^{-6}$ |
| rs77982873  | T | C | Other disorders of ear                                                     | UKBB | European | -0.002 | $5.39 \times 10^{-6}$ |
| rs77377087  | A | T | Other disorders of ear                                                     | UKBB | European | -0.002 | $5.39 \times 10^{-6}$ |
| rs11465408  | A | G | Cause of death: inquest adjourned death                                    | UKBB | European | 0.007  | $5.44 \times 10^{-6}$ |
| rs17159887  | T | C | Other disorders of ear                                                     | UKBB | European | -0.002 | $5.89 \times 10^{-6}$ |
| rs57889796  | T | C | Other disorders of ear                                                     | UKBB | European | -0.002 | $5.99 \times 10^{-6}$ |
| rs73493971  | A | G | Cause of death: bladder, unspecified                                       | UKBB | European | -0.084 | $6.11 \times 10^{-6}$ |
| rs111716431 | A | G | Cause of death: cerebrum, except lobes and ventricles                      | UKBB | European | 0.017  | $6.11 \times 10^{-6}$ |
| rs11465411  | A | G | Other surgical follow-up care                                              | UKBB | European | -0.001 | $6.20 \times 10^{-6}$ |
| rs57668221  | C | G | Other disorders of ear                                                     | UKBB | European | -0.002 | $6.21 \times 10^{-6}$ |
| rs11465410  | T | C | Other surgical follow-up care                                              | UKBB | European | -0.001 | $6.49 \times 10^{-6}$ |
| rs190601505 | A | G | Cause of death: bladder, unspecified                                       | UKBB | European | 0.082  | $7.70 \times 10^{-6}$ |
| rs11465395  | C | G | Self-reported parathyroid hyperplasia or adenoma                           | UKBB | European | 0.002  | $7.77 \times 10^{-6}$ |
| rs111716431 | A | G | Other disorders of ear                                                     | UKBB | European | 0.002  | $7.84 \times 10^{-6}$ |
| rs73493973  | A | G | Self-reported parathyroid hyperplasia or adenoma                           | UKBB | European | 0.002  | $8.78 \times 10^{-6}$ |
| rs73493968  | T | C | Self-reported parathyroid hyperplasia or adenoma                           | UKBB | European | -0.002 | $8.97 \times 10^{-6}$ |
| rs71534255  | A | C | Other acquired deformities of musculoskeletal system and connective tissue | UKBB | European | 0.004  | $9.36 \times 10^{-6}$ |
| rs73493966  | C | G | Self-reported parathyroid hyperplasia or adenoma                           | UKBB | European | -0.002 | $9.46 \times 10^{-6}$ |
| rs536227604 | T | C | Cause of death: vascular disorder of intestine, unspecified                | UKBB | European | -0.065 | $9.70 \times 10^{-6}$ |
| rs112039104 | A | C | Self-reported parathyroid hyperplasia or adenoma                           | UKBB | European | 0.002  | $9.77 \times 10^{-6}$ |
| rs113398041 | T | C | Self-reported parathyroid hyperplasia or adenoma                           | UKBB | European | -0.002 | $9.80 \times 10^{-6}$ |
| rs113836492 | A | G | Cause of death: thoracic aortic aneurysm, ruptured                         | UKBB | European | 0.011  | $9.81 \times 10^{-6}$ |
| rs73493975  | A | G | Self-reported parathyroid hyperplasia or adenoma                           | UKBB | European | -0.002 | $9.97 \times 10^{-6}$ |

**Table S3.** The top 100 CD209 expression associated traits identified by PheWAS in lung tissues.

| Phenotype                                                                                            | phenotype_source | zscore | effect_size | pvalue                |
|------------------------------------------------------------------------------------------------------|------------------|--------|-------------|-----------------------|
| Neutrophill percentage                                                                               | UK Biobank       | -4.159 | -0.604      | $3.20 \times 10^{-5}$ |
| Neutrophill count                                                                                    | UK Biobank       | -4.108 | -0.100      | $4.00 \times 10^{-5}$ |
| Diagnoses - main ICD10: L92 Granulomatous disorders of skin and subcutaneous tissue                  | UK Biobank       | -3.840 | -0.002      | $1.23 \times 10^{-4}$ |
| Granulomatous disorders of skin and subcutaneous tissue                                              | UK Biobank       | -3.840 | -0.002      | $1.23 \times 10^{-4}$ |
| Granulocyte Count                                                                                    | Astle_et_al_2016 | -3.822 |             | $1.32 \times 10^{-4}$ |
| Manic/hyper symptoms: I was more creative or had more ideas than usual                               | UK Biobank       | -3.819 | -0.081      | $1.34 \times 10^{-4}$ |
| Sum Neutrophil Eosinophil Count                                                                      | Astle_et_al_2016 | -3.745 |             | $1.80 \times 10^{-4}$ |
| Lymphocyte percentage                                                                                | UK Biobank       | 3.617  | 0.455       | $2.98 \times 10^{-4}$ |
| Sum Basophil Neutrophil Count                                                                        | Astle_et_al_2016 | -3.556 |             | $3.77 \times 10^{-4}$ |
| Myeloid White Cell Count                                                                             | Astle_et_al_2016 | -3.534 |             | $4.09 \times 10^{-4}$ |
| Neutrophil Count                                                                                     | Astle_et_al_2016 | -3.468 |             | $5.24 \times 10^{-4}$ |
| Duration of fitness test                                                                             | UK Biobank       | 3.400  | 0.102       | $6.74 \times 10^{-4}$ |
| Diagnoses - main ICD10: Z45 Adjustment and management of implanted device                            | UK Biobank       | 3.391  | 0.005       | $6.97 \times 10^{-4}$ |
| Impact on normal roles during worst period of anxiety                                                | UK Biobank       | -3.390 | -0.169      | $6.99 \times 10^{-4}$ |
| White Blood Cell Count                                                                               | Astle_et_al_2016 | -3.342 |             | $8.32 \times 10^{-4}$ |
| Monocyte percentage                                                                                  | UK Biobank       | 3.231  | 0.149       | $1.24 \times 10^{-3}$ |
| Long-standing illness, disability or infirmity                                                       | UK Biobank       | -3.194 | -0.026      | $1.40 \times 10^{-3}$ |
| Recent feelings of tiredness or low energy                                                           | UK Biobank       | -3.191 | -0.077      | $1.42 \times 10^{-3}$ |
| Treatment/medication code: amoxicillin (20003_1141180226)                                            | UK Biobank       | -3.148 | -0.002      | $1.64 \times 10^{-3}$ |
| Thoughts of death during worst depression                                                            | UK Biobank       | -3.138 | -0.064      | $1.70 \times 10^{-3}$ |
| Non-cancer illness code, self-reported: pleurisy                                                     | UK Biobank       | -3.109 | -0.003      | $1.88 \times 10^{-3}$ |
| Other disorders involving the immune mechanism, not elsewhere classified                             | UK Biobank       | -3.020 | -0.001      | $2.53 \times 10^{-3}$ |
| Stenosis and insufficiency of lacrimal passages                                                      | UK Biobank       | 2.995  | 0.002       | $2.75 \times 10^{-3}$ |
| White blood cell (leukocyte) count                                                                   | UK Biobank       | -2.968 | -0.105      | $3.00 \times 10^{-3}$ |
| Diagnoses - main ICD10: D89 Other disorders involving the immune mechanism, not elsewhere classified | UK Biobank       | -2.964 | -0.001      | $3.03 \times 10^{-3}$ |
| Diagnoses - main ICD10: D09 Carcinoma in situ of other and unspecified sites                         | UK Biobank       | -2.960 | -0.001      | $3.08 \times 10^{-3}$ |
| Treatment/medication code: diprosalic ointment (20003_1140882618)                                    | UK Biobank       | 2.944  | 0.001       | $3.24 \times 10^{-3}$ |
| Never eat eggs, dairy, wheat, sugar: Wheat products                                                  | UK Biobank       | -2.913 | -0.008      | $3.58 \times 10^{-3}$ |
| Hospital episode type: General episode                                                               | UK Biobank       | -2.912 | -0.022      | $3.60 \times 10^{-3}$ |
| Spondylolisthesis/Spondylolysis                                                                      | UK Biobank       | -2.887 | -0.002      | $3.89 \times 10^{-3}$ |
| Diagnoses - main ICD10: C49 Malignant neoplasm of other connective and soft tissue                   | UK Biobank       | -2.867 | -0.001      | $4.15 \times 10^{-3}$ |
| Diagnoses - main ICD10: M43 Other deforming dorsopathies                                             | UK Biobank       | -2.864 | -0.002      | $4.18 \times 10^{-3}$ |
| Job coding: educational assistant, classroom assistant, special needs helper (22601_61243409)        | UK Biobank       | -2.859 | -0.015      | $4.25 \times 10^{-3}$ |
| Job coding: credit controller/supervisor (22601_41213252)                                            | UK Biobank       | 2.838  | 0.005       | $4.54 \times 10^{-3}$ |
| Length of time at current address                                                                    | UK Biobank       | 2.824  | 0.530       | $4.74 \times 10^{-3}$ |



|                                                                                                                                                |                  |        |        |                       |
|------------------------------------------------------------------------------------------------------------------------------------------------|------------------|--------|--------|-----------------------|
| Diagnoses - main ICD10: S43 Dislocation, sprain and strain of joints and ligaments of shoulder girdle                                          | UK Biobank       | -2.795 | -0.001 | $5.19 \times 10^{-3}$ |
| Treatment/medication code: vitamin b6 preparation (20003_1140909874)                                                                           | UK Biobank       | -2.788 | -0.002 | $5.31 \times 10^{-3}$ |
| Destinations on discharge from hospital (recoded): Usual Place of residence                                                                    | UK Biobank       | -2.787 | -0.023 | $5.32 \times 10^{-3}$ |
| Types of transport used (excluding work): Walk                                                                                                 | UK Biobank       | -2.778 | -0.024 | $5.47 \times 10^{-3}$ |
| Leg fat percentage (right)                                                                                                                     | UK Biobank       | 2.775  | 0.262  | $5.53 \times 10^{-3}$ |
| Traumatic subarachnoid haemorrhage                                                                                                             | UK Biobank       | -2.774 | -0.001 | $5.53 \times 10^{-3}$ |
| Non-cancer illness code, self-reported: osteopenia                                                                                             | UK Biobank       | -2.760 | -0.002 | $5.78 \times 10^{-3}$ |
| Astigmatism angle (left)                                                                                                                       | UK Biobank       | -2.755 | -5.147 | $5.87 \times 10^{-3}$ |
| Treatment/medication code: frusemide (20003_1140866116)                                                                                        | UK Biobank       | -2.729 | -0.002 | $6.34 \times 10^{-3}$ |
| ECG, load                                                                                                                                      | UK Biobank       | 2.725  | 1.935  | $6.43 \times 10^{-3}$ |
| Sum Eosinophil Basophil Count                                                                                                                  | Astle_et_al_2016 | -2.706 |        | $6.81 \times 10^{-3}$ |
| #Deforming dorsopathies                                                                                                                        | UK Biobank       | -2.674 | -0.002 | $7.50 \times 10^{-3}$ |
| Loud music exposure frequency                                                                                                                  | UK Biobank       | -2.668 | -0.057 | $7.63 \times 10^{-3}$ |
| Treatment/medication code: persantin 25mg tablet (20003_1140861780)                                                                            | UK Biobank       | 2.667  | 0.001  | $7.65 \times 10^{-3}$ |
| ECG, phase time                                                                                                                                | UK Biobank       | 2.656  | 5.040  | $7.92 \times 10^{-3}$ |
| Treatment/medication code: vesicare 5mg tablet (20003_1141200384)                                                                              | UK Biobank       | 2.649  | 0.001  | $8.08 \times 10^{-3}$ |
| Job SOC coding: Vehicle body builders and repairers                                                                                            | UK Biobank       | -2.648 | -0.004 | $8.11 \times 10^{-3}$ |
| Difficulty concentrating during worst depression                                                                                               | UK Biobank       | -2.645 | -0.046 | $8.18 \times 10^{-3}$ |
| Other and unspecified granulomatous disorders of skin and subcutaneous tissue                                                                  | UK Biobank       | -2.639 | -0.001 | $8.32 \times 10^{-3}$ |
| Job coding: civil service executive officer, revenue/tax executive or officer, fraud inspector or officer, job centre adviser (22601_41113204) | UK Biobank       | -2.632 | -0.017 | $8.49 \times 10^{-3}$ |
| Treatment/medication code: vascalpha 5mg m/r tablet (20003_1141190160)                                                                         | UK Biobank       | 2.616  | 0.001  | $8.89 \times 10^{-3}$ |
| Job SOC coding: Civil Service executive officers                                                                                               | UK Biobank       | -2.611 | -0.017 | $9.04 \times 10^{-3}$ |
| Mouth/teeth dental problems: Mouth ulcers                                                                                                      | UK Biobank       | -2.603 | -0.014 | $9.24 \times 10^{-3}$ |
| Diagnoses - main ICD10: E86 Volume depletion                                                                                                   | UK Biobank       | 2.599  | 0.001  | $9.35 \times 10^{-3}$ |
| Diseases of veins, lymphatic vessels and lymph nodes, not elsewhere classified                                                                 | UK Biobank       | 2.594  | 0.008  | $9.48 \times 10^{-3}$ |
| Non-cancer illness code, self-reported: insomnia                                                                                               | UK Biobank       | -2.568 | -0.001 | $1.02 \times 10^{-2}$ |
| Activities undertaken to treat depression: Talking therapies, such as psychotherapy, counselling, group therapy or CBT                         | UK Biobank       | -2.567 | -0.031 | $1.03 \times 10^{-2}$ |
| Job SOC coding: Educational assistants                                                                                                         | UK Biobank       | -2.550 | -0.014 | $1.08 \times 10^{-2}$ |
| Other and unspecified disorders of skin and subcutaneous tissue                                                                                | UK Biobank       | -2.545 | -0.004 | $1.09 \times 10^{-2}$ |
| Multiple worries during worst period of anxiety                                                                                                | UK Biobank       | -2.528 | -0.059 | $1.15 \times 10^{-2}$ |
| Age at death                                                                                                                                   | UK Biobank       | 2.526  | 0.516  | $1.15 \times 10^{-2}$ |
| Sensitivity / hurt feelings                                                                                                                    | UK Biobank       | -2.522 | -0.021 | $1.17 \times 10^{-2}$ |
| Time spent doing vigorous physical activity                                                                                                    | UK Biobank       | -2.521 | -0.159 | $1.17 \times 10^{-2}$ |
| Seen doctor (GP) for nerves, anxiety, tension or depression                                                                                    | UK Biobank       | -2.520 | -0.020 | $1.17 \times 10^{-2}$ |
| Diagnoses - main ICD10: N90 Other noninflammatory disorders of vulva and perineum                                                              | UK Biobank       | -2.520 | -0.002 | $1.17 \times 10^{-2}$ |

|                                                                                                       |                  |        |        |                       |
|-------------------------------------------------------------------------------------------------------|------------------|--------|--------|-----------------------|
| Non-cancer illness code, self-reported: labyrinthitis                                                 | UK Biobank       | -2.515 | -0.001 | $1.19 \times 10^{-2}$ |
| Job SOC coding: Upholsterers                                                                          | UK Biobank       | 2.512  | 0.003  | $1.20 \times 10^{-2}$ |
| Maximum workload during fitness test                                                                  | UK Biobank       | 2.503  | 3.244  | $1.23 \times 10^{-2}$ |
| Diagnoses - main ICD10: N32 Other disorders of bladder                                                | UK Biobank       | -2.495 | -0.005 | $1.26 \times 10^{-2}$ |
| Number of trend entries                                                                               | UK Biobank       | 2.491  | 2.562  | $1.27 \times 10^{-2}$ |
| Job SOC coding: Textile process operatives                                                            | UK Biobank       | -2.483 | -0.005 | $1.30 \times 10^{-2}$ |
| Leg fat percentage (left)                                                                             | UK Biobank       | 2.481  | 0.223  | $1.31 \times 10^{-2}$ |
| Diseases of the musculoskeletal system and connective tissue                                          | UK Biobank       | -2.480 | -0.017 | $1.31 \times 10^{-2}$ |
| Fibromyalgia related co-morbidities                                                                   | UK Biobank       | -2.472 | -0.003 | $1.34 \times 10^{-2}$ |
| Treatment/medication code: omacor 1g capsule (20003_1141181868)                                       | UK Biobank       | -2.469 | -0.002 | $1.35 \times 10^{-2}$ |
| Depression possibly related to stressful or traumatic event                                           | UK Biobank       | -2.455 | -0.043 | $1.41 \times 10^{-2}$ |
| Treatment/medication code: salbutamol 100micrograms spacehaler (20003_1140926606)                     | UK Biobank       | 2.451  | 0.003  | $1.43 \times 10^{-2}$ |
| Eosinophil Count                                                                                      | Astle_et_al_2016 | -2.444 |        | $1.45 \times 10^{-2}$ |
| Hypergammaglobulinemia, unspecified                                                                   | UK Biobank       | -2.444 | -0.001 | $1.45 \times 10^{-2}$ |
| Diagnoses - main ICD10: K11 Diseases of salivary glands                                               | UK Biobank       | -2.435 | -0.002 | $1.49 \times 10^{-2}$ |
| Other disorders of skin and subcutaneous tissue, not elsewhere classified                             | UK Biobank       | -2.420 | -0.004 | $1.55 \times 10^{-2}$ |
| Diagnoses - main ICD10: L98 Other disorders of skin and subcutaneous tissue, not elsewhere classified | UK Biobank       | -2.420 | -0.004 | $1.55 \times 10^{-2}$ |
| Ankle spacing width                                                                                   | UK Biobank       | 2.418  | 0.216  | $1.56 \times 10^{-2}$ |
| Diagnoses - main ICD10: C67 Malignant neoplasm of bladder                                             | UK Biobank       | -2.410 | -0.003 | $1.60 \times 10^{-2}$ |
| Job coding: taxi or cab driver, chauffeur, hearse driver (22601_82142611)                             | UK Biobank       | 2.409  | 0.004  | $1.60 \times 10^{-2}$ |
| Illnesses of father: Stroke                                                                           | UK Biobank       | 2.406  | 0.016  | $1.62 \times 10^{-2}$ |
| Basophil count                                                                                        | UK Biobank       | -2.405 | -0.035 | $1.62 \times 10^{-2}$ |
| Job coding: textile machine operator, assembler, spinner, foreman (22601_81132710)                    | UK Biobank       | -2.399 | -0.004 | $1.65 \times 10^{-2}$ |
| Job SOC coding: Taxi, cab drivers and chauffeurs                                                      | UK Biobank       | 2.397  | 0.004  | $1.65 \times 10^{-2}$ |
| Diagnoses - main ICD10: J38 Diseases of vocal cords and larynx, not elsewhere classified              | UK Biobank       | -2.395 | -0.002 | $1.66 \times 10^{-2}$ |
| Job coding: upholsterer, coach trimmer, curtain maker, mattress maker (22601_54122878)                | UK Biobank       | 2.387  | 0.003  | $1.70 \times 10^{-2}$ |
| Other serious medical condition/disability diagnosed by doctor                                        | UK Biobank       | -2.385 | -0.017 | $1.71 \times 10^{-2}$ |
| Used an inhaler for chest within last hour                                                            | UK Biobank       | -2.376 | -0.004 | $1.75 \times 10^{-2}$ |
| Treatment/medication code: kapake tablet (20003_1140864070)                                           | UK Biobank       | 2.367  | 0.001  | $1.79 \times 10^{-2}$ |
| Birth Weight                                                                                          | EGG              | -2.366 |        | $1.80 \times 10^{-2}$ |

**Table S4.** Mendelian Randomization inferred causal effect of plasma expression of DC-SIGN on cell count and percentage.

| Outcome                                                              | nsnp | b      | se    | pval                   |
|----------------------------------------------------------------------|------|--------|-------|------------------------|
| White blood cell (leukocyte) count    id:ukb-d-30000_irnt            | 3    | -0.031 | 0.003 | $5.40 \times 10^{-27}$ |
| Neutrophil count    id:ukb-d-30140_irnt                              | 3    | -0.027 | 0.003 | $1.38 \times 10^{-16}$ |
| Red blood cell count    id:ieu-a-275                                 | 3    | -0.014 | 0.003 | $2.31 \times 10^{-7}$  |
| Lymphocyte percentage    id:ukb-d-30180_irnt                         | 3    | 0.017  | 0.004 | $5.29 \times 10^{-5}$  |
| Granulocyte count    id:ebi-a-GCST004614                             | 2    | -0.042 | 0.011 | $1.01 \times 10^{-4}$  |
| Sum neutrophil eosinophil counts    id:ebi-a-GCST004613              | 2    | -0.041 | 0.011 | $1.41 \times 10^{-4}$  |
| Myeloid white cell count    id:ebi-a-GCST004626                      | 2    | -0.040 | 0.011 | $2.61 \times 10^{-4}$  |
| Sum basophil neutrophil counts    id:ebi-a-GCST004620                | 2    | -0.039 | 0.011 | $3.27 \times 10^{-4}$  |
| Granulocyte percentage of myeloid white cells    id:ebi-a-GCST004608 | 2    | -0.039 | 0.011 | $3.63 \times 10^{-4}$  |
| Neutrophil count    id:ebi-a-GCST004629                              | 2    | -0.038 | 0.011 | $4.83 \times 10^{-4}$  |
| White blood cell count    id:ebi-a-GCST004610                        | 2    | -0.037 | 0.01  | $6.52 \times 10^{-4}$  |
| Lymphocyte count    id:ukb-d-30120_irnt                              | 3    | -0.011 | 0.003 | $1.69 \times 10^{-3}$  |
| Red blood cell (erythrocyte) count    id:ukb-d-30010_irnt            | 3    | -0.030 | 0.010 | $1.94 \times 10^{-3}$  |
| Monocyte percentage of white cells    id:ebi-a-GCST004609            | 2    | 0.031  | 0.012 | $8.52 \times 10^{-3}$  |
| Eosinophil counts    id:ebi-a-GCST004606                             | 2    | -0.028 | 0.011 | $9.18 \times 10^{-3}$  |
| Monocyte count    id:ukb-d-30130_irnt                                | 3    | -0.042 | 0.017 | $1.12 \times 10^{-2}$  |
| Neutrophil percentage of white cells    id:ebi-a-GCST004633          | 2    | -0.025 | 0.011 | $2.28 \times 10^{-2}$  |
| Eosinophil percentage    id:ukb-d-30210_irnt                         | 3    | -0.010 | 0.004 | $2.47 \times 10^{-2}$  |
| Lymphocyte percentage of white cells    id:ebi-a-GCST004632          | 2    | 0.023  | 0.011 | $3.48 \times 10^{-2}$  |

nsnp: number of SNPs used in analysis; b: beta coefficient; se: standard error

Inverse variance weighted method was used in this analysis.
